# Supplementary material
Source: MDPI journal article supplement (https://www.mdpi.com/2304-6740/12/5/139)
Supplement: s1 [file s1]

Supplementary Information

**Table S1** Selected bond lengths (Å) and bond angles (°) of Ni(II) and Co(II) centers in the compounds **1** and **2** respectively.

| Bond distances of 1 (in Å) |            | Bond angles of 1 (in Degree) |            |
|----------------------------|------------|------------------------------|------------|
| Mn1–Cl1                    | 2.4485(11) | N1A–Mn1–N1B                  | 152.42(12) |
| Mn1–Cl2                    | 2.4424(11) | N1A–Mn1–N10B                 | 90.11(12)  |
| Mn1–N1A                    | 2.261(4)   | N1B–Mn1–N10B                 | 72.12(12)  |
| Mn1–N10A                   | 2.343(4)   | NA–Mn1–N10A                  | 71.99(13)  |
| Mn1–N1B                    | 2.284(3)   | N1B–Mn1–N10A                 | 85.34(12)  |
| Mn1–N10B                   | 2.320(3)   | N10B–Mn1–N10A                | 85.22(12)  |
|                            |            | N10A–Mn1–Cl1                 | 104.06(9)  |
|                            |            | N1A–Mn1–Cl2                  | 92.28(8)   |
|                            |            | N1B–Mn1–Cl2                  | 164.38(9)  |
|                            |            | N10B–Mn1–Cl2                 | 92.87(9)   |
|                            |            | N10A–Mn1–Cl2                 | 94.5(1)    |
|                            |            | N1A–Mn1–Cl1                  | 105.22(9)  |
|                            |            | N10B–Mn1–Cl1                 | 87.27(9)   |
|                            |            | N10A–Mn1–Cl1                 | 164.49(9)  |
|                            |            | Cl2–Mn1–Cl1                  | 97.94(4)   |
| Bond distances of 2 (in Å) |            | Bond angles of 2 (in Degree) |            |
| Zn1–O3                     | 2.016(2)   | O3–Zn1–N1                    | 106.26(9)  |
| Zn1–N1                     | 2.070(3)   | O3–Zn1–N3                    | 96.24(9)   |
| Zn1–N3                     | 2.071(2)   | N1–Zn1–N3                    | 104.32(10) |
| Zn1–O1                     | 2.105(3)   | O3–Zn1–O2                    | 92.21(9)   |
| Zn1–O2                     | 2.292(3)   | N1–Zn1–O2                    | 143.86(11) |
| Zn1–C1                     | 2.535(3)   | N3–Zn1–O2                    | 104.17(9)  |
|                            |            | O1–Zn1–O2                    | 59.39(10)  |
|                            |            | O3–Zn1–O1                    | 149.88(11) |
|                            |            | N1–Zn1–O1                    | 93.92(10)  |
|                            |            | N3–Zn1–O1                    | 100.20(11) |

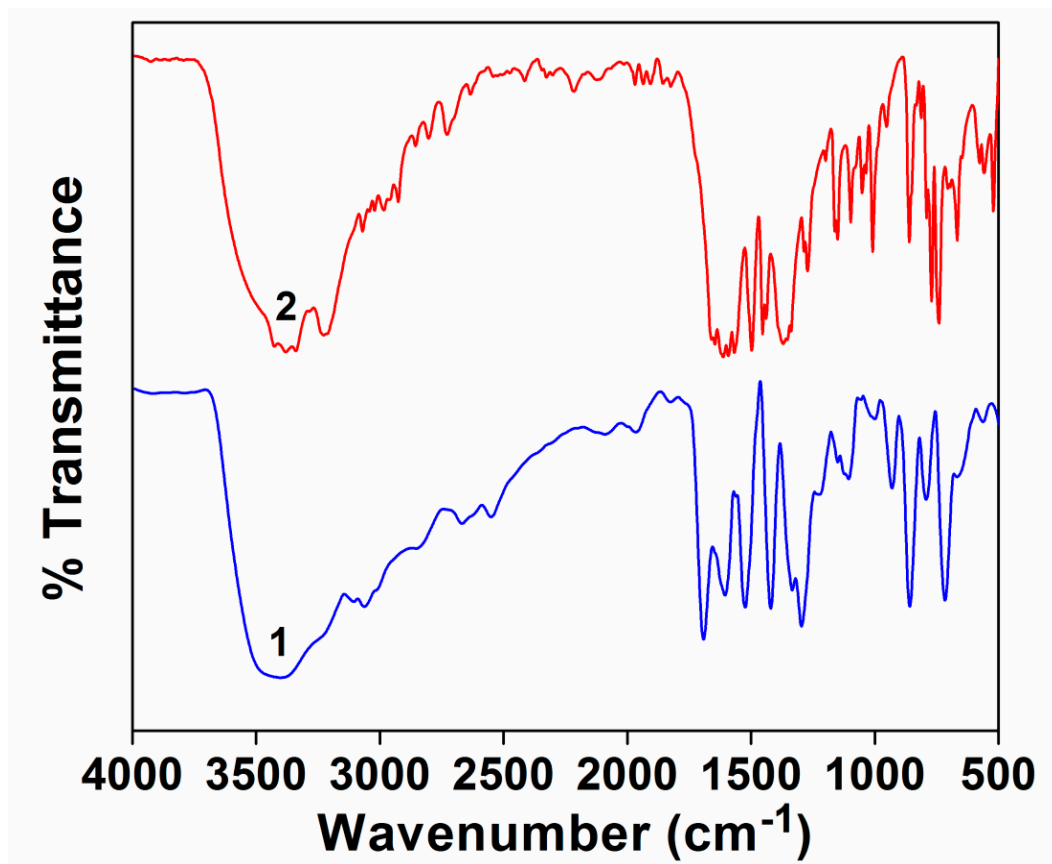

**Figure S1.** FT-IR Spectra of compounds **1** and **2**.

### 2.3.2 Electronic spectroscopy

The electronic spectra of the compounds **1** and **2** have been recorded in solid as well as in aqueous state (Figure S2-S3). The electronic spectra of compound **1** does not exhibit any absorption bands in the visible region, as Mn(II) centre ( $d^5$  system) has all the electronic transitions from the  ${}^6A_{1g}$  ground state doubly forbidden [1-2]. The peaks at 221 and 271 nm in the solid state UV-Vis-NIR spectrum can be assigned to the  $\pi \rightarrow \pi^*$  transition of the aromatic ligand [3]. In the aqueous state UV-Vis spectrum these absorption peaks were obtained at 227 and 268 nm respectively [3].

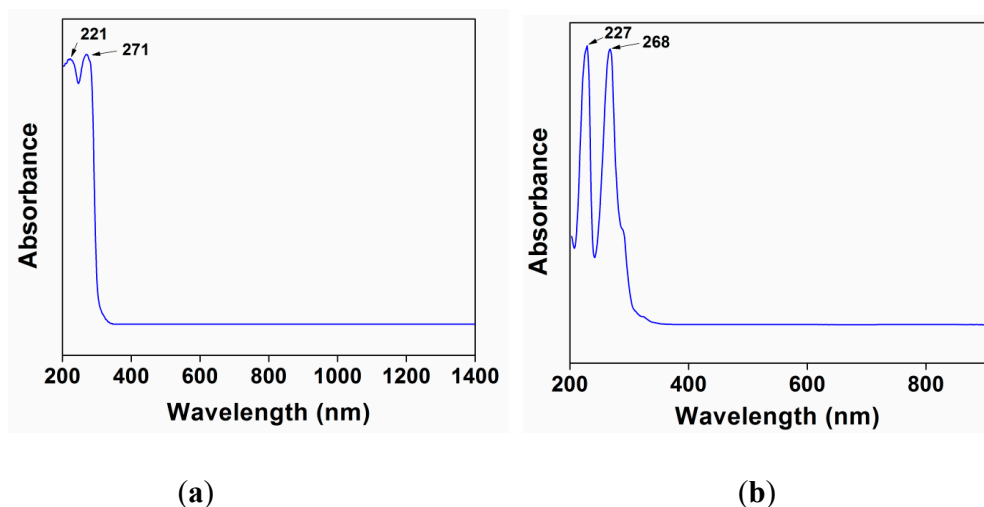

**Figure S2. (a) UV-Vis-NIR spectrum of 1 (b) UV-Vis spectrum of compound 1**

The electronic spectra of the diamagnetic Zn(II) compound (**2**) do not show any absorption bands (Figure S3) in the visible region [4-6]. The absorption bands at 225 and 272 nm in the UV-Vis-NIR spectrum of compound **2** can be attributed to the  $\pi \rightarrow \pi^*$  transition of the aromatic ligands [7]. These absorption peaks are obtained at 222 and 269 nm in the aqueous phase UV-Vis spectrum. The observed similarities in the absorption peaks of compounds **1** and **2** in both the phases suggest that the compounds do not undergo any structural distortion in the aqueous phase [8,9].

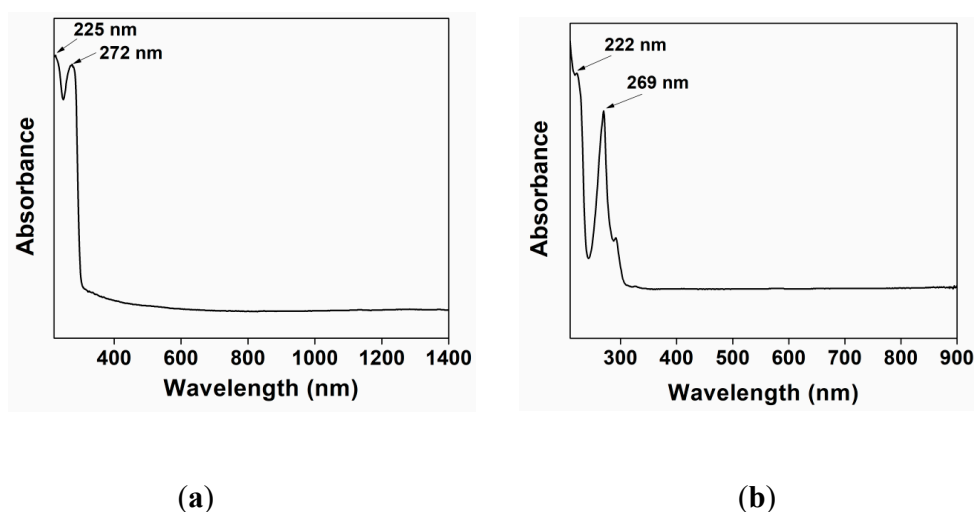

**Figure S3. (a) UV-Vis-NIR spectrum of 2 (b) UV-Vis spectra of compound 2**

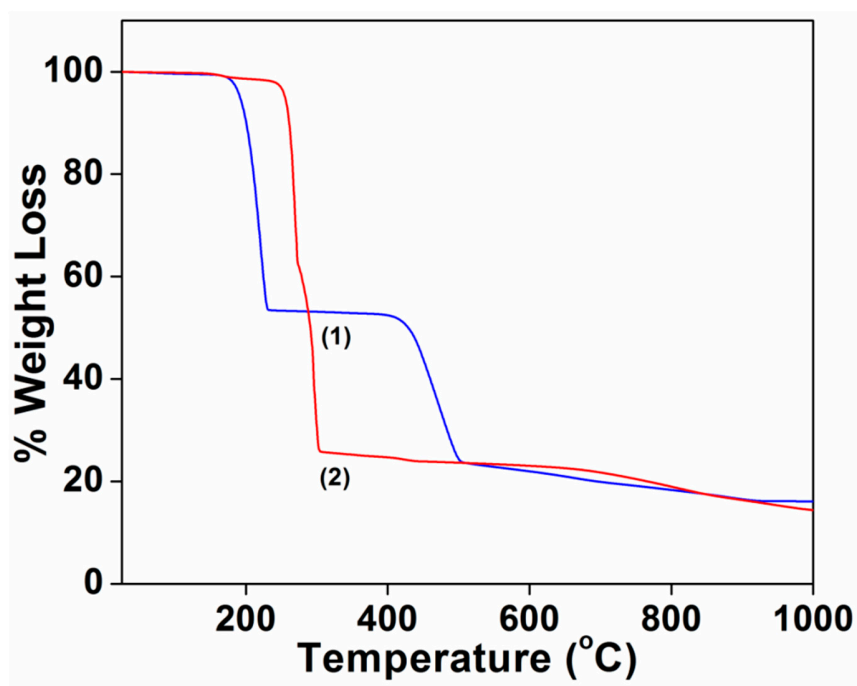

**Figure S4.** TG analysis of compounds **1** and **2**.

#### Supplementary references

1. Nashre-ul-Islam, S. M.; Dutta, D.; Guha, A. K.; Bhattacharyya, M. K. An Unusual Werner Type Clathrate of Mn(II) Benzoate Involving Energetically Significant Weak CH $\cdots$ C Contacts: A Combined Experimental and Theoretical Study. *J. Mol. Struct.* **2019**, *1175*, 130–138.
2. Aligo, J. A.; Smith, L.; Eglin, J. L.; Pence, L. E. Solution and Solid-State Variation of Cupric Phenanthroline Complexes. *Inorg. Chem.* **2005**, *44*, 4001–4007.
3. Sizova, O. V.; Ershov, A. Y.; Ivanova, N. V.; Shashko, A. D.; Kuteikina-Teplyakova, A. V. Ru(II) Chloro-bis(bipyridyl) Complexes with Substituted Pyridine Ligands: Interpretation of Their Electronic Absorption Spectra. *Russ. J. Coord. Chem.* **2003**, *29*, 494–500.
4. de Araújo, E. L.; Barbosa, H. F. G.; Dockal, E. R.; Cavaleiro, É. T. G. Synthesis, Characterization and Biological Activity of Cu(II), Ni(II), and Zn(II) Complexes of

Biopolymeric Schiff Bases of Salicylaldehydes and Chitosan. *Int. J. Biol. Macromol.* **2017**, *95*, 168–176.

5. Ekennia, A. C.; Onwudiwe, D. C.; Osowole, A. A.; Olasunkanmi, L. O.; Ebenso, E. E. Synthesis, Biological, and Quantum Chemical Studies of Zn(II) and Ni(II) Mixed-Ligand Complexes Derived from N,N-Disubstituted Dithiocarbamate and Benzoic Acid. *J. Chem.* **2016** 2016 5129010-5129025.
6. Kalarani, R.; Sankarganesh, M.; Kumar, G. V.; Kalanithi, M. Synthesis, Spectral, DFT Calculation, Sensor, Antimicrobial and DNA Binding Studies of Co(II), Cu(II), and Zn(II) Metal Complexes with 2-Amino Benzimidazole Schiff Base. *J. Mol. Struct.* **2020**, *1206*, 127725-127740.
7. de Mesquita, M. E.; Junior, S. A.; Oliveira, F. C.; Freire, R. O.; Júnior, N. B. C.; De Sá, G. F. Synthesis, Spectroscopic Studies and Structure Prediction of the New Tb(3-NH<sub>2</sub>PIC)<sub>3</sub>·3H<sub>2</sub>O Complex. *Inorg. Chem. Commun.* **2002**, *5*, 292–295.
8. Ghosh, M.; Majee, A.; Nethaji, M.; Chattopadhyay, T. Syntheses and Characterization of trans-[NiL<sub>2</sub>(NCS)<sub>2</sub>][L = 2-(Aminomethyl) Pyridine], trans-[NiL<sub>2</sub>'(NSC)<sub>2</sub>][L' = 2-(2-Aminoethyl) Pyridine] and trans-[NiL<sub>2</sub>''(NSC)<sub>2</sub>][L'' = 2-(2-Methylaminoethyl) Pyridine] Complexes: X-ray Single Crystal Structure of trans-[NiL<sub>2</sub>'(NSC)<sub>2</sub>][L' = 2-(2-Aminoethyl) Pyridine]. *Inorg. Chim. Acta* **2009**, *362*, 2052–2055.
9. Yenikaya, C.; Poyraz, M.; Sarı, M.; Demirci, F.; İlkimen, H.; Büyükgüngör, O. Synthesis, Characterization and Biological Evaluation of a Novel Cu(II) Complex with the Mixed Ligands 2,6-Pyridinedicarboxylic Acid and 2-Aminopyridine. *Polyhedron* **2009**, *28*, 3526–3532.
